# Supplementary material for: Citrinin Is a Potential Quorum Sensing Inhibitor against Pseudomonas aeruginosa
Source: MDPI journal article supplement (doi:10.3390/md21050296), 2023-05-12
Supplement: s1 [file s1]

## Supporting Information

# Citrinin Is a Potential Quorum Sensing Inhibitor Against *Pseudomonas aeruginosa*

Hongrui Ji<sup>1,2,3,4,†</sup>, Lu Zhao<sup>1,2,3,4,†</sup>, Kaiwen Lv<sup>1,2,3,4</sup>, Yuzhu Zhang<sup>1,2,3,4</sup>, Haibo Gao<sup>1,2,3,4</sup>,  
Qianhong Gong<sup>1,2,3,4,\*</sup> and Wengong Yu<sup>1,2,3,4,\*</sup>

- 1 School of Medicine and Pharmacy, Ocean University of China, 5 Yushan Road, Qingdao 266003, China; jhr@stu.ouc.edu.cn (H.J.)
  - 2 Laboratory for Marine Drugs and Bioproducts, Qingdao National Laboratory for Marine Science and Technology, 1 Wenhai Road, Qingdao 266237, China
  - 3 Key Laboratory of Marine Drugs, Chinese Ministry of Education, School of Medicine and Pharmacy, Ocean University of China, 5 Yushan Road, Qingdao 266003, China
  - 4 Provincial Key Laboratory of Glycoscience and Glycotechnology, Ocean University of China, 5 Yushan Road, Qingdao 266003, China
- \* Correspondence: gongqh@ouc.edu.cn (Q.G.); yuwg66@ouc.edu.cn (W.Y.);  
Tel.: +86-532-82032067 (Q.G.); +86-532-82031680 (W.Y.)
- † These authors contributed equally to this work.

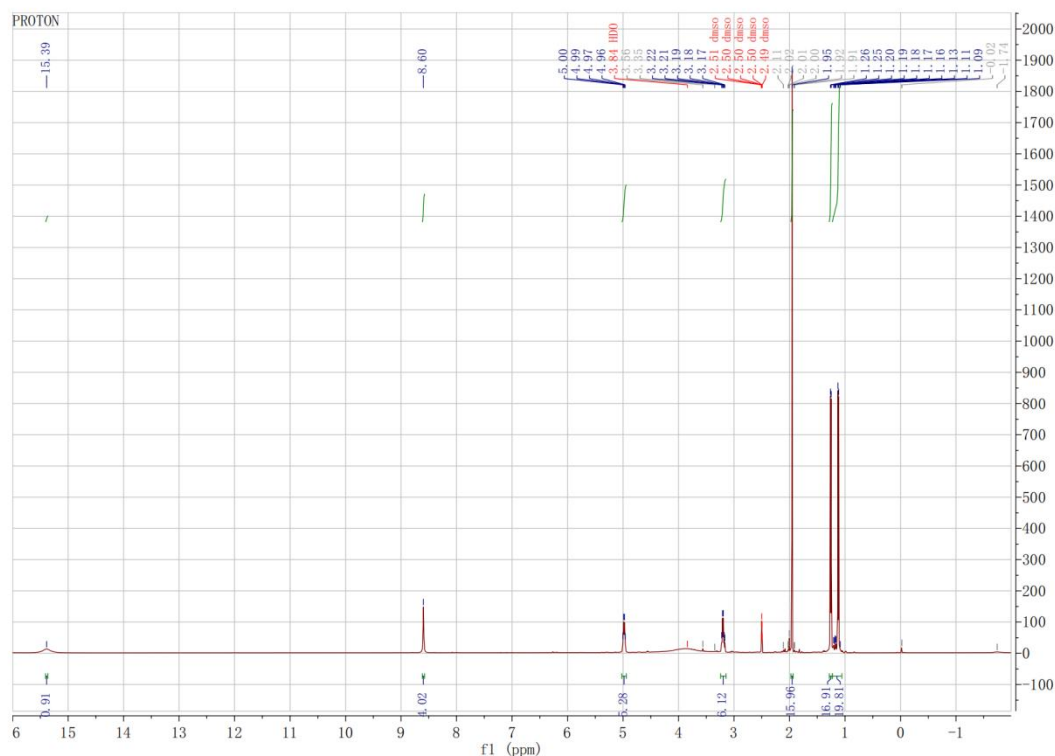

**Figure S1.**  $^1\text{H}$ -NMR spectroscopy of the anti-QS compound (Solvent:  $\text{DMSO-}d_6$ ).  $^1\text{H}$  NMR (500M Hz,  $\text{DMSO-}d_6$ )  $\delta$  15.39 (s, 1H), 8.60(s, 1H), 4.98(q,  $J=6.7\text{Hz}$ , 1H), 3.20(q,  $J=7.2\text{Hz}$ , 1H), 1.95(s, 4H), 1.26(d,  $J=6.7\text{Hz}$ , 4H), 1.12(d,  $J=7.2\text{Hz}$ , 1H).

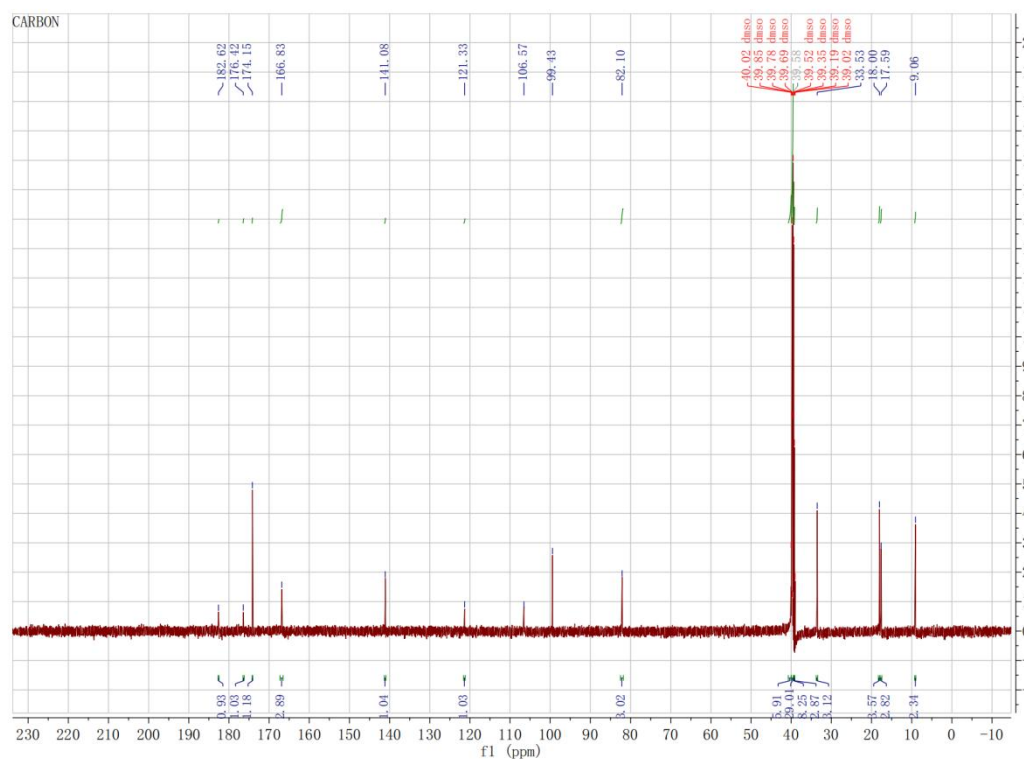

**Figure S2.**  $^{13}\text{C}$ -NMR spectroscopy of the anti-QS compound (Solvent:  $\text{DMSO-}d_6$ ).  $^{13}\text{C}$  NMR (126 MHz,  $\text{DMSO}$ )  $\delta$  182.62, 176.42, 174.16, 166.83, 141.08, 121.33, 106.57, 99.43, 82.10, 33.53, 18.00, 17.59, 9.06.

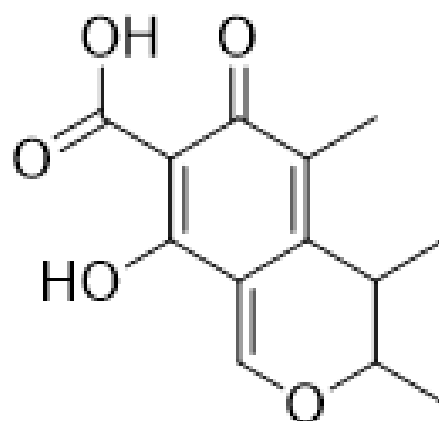

**Figure S3.** Chemical structure of citrinin.

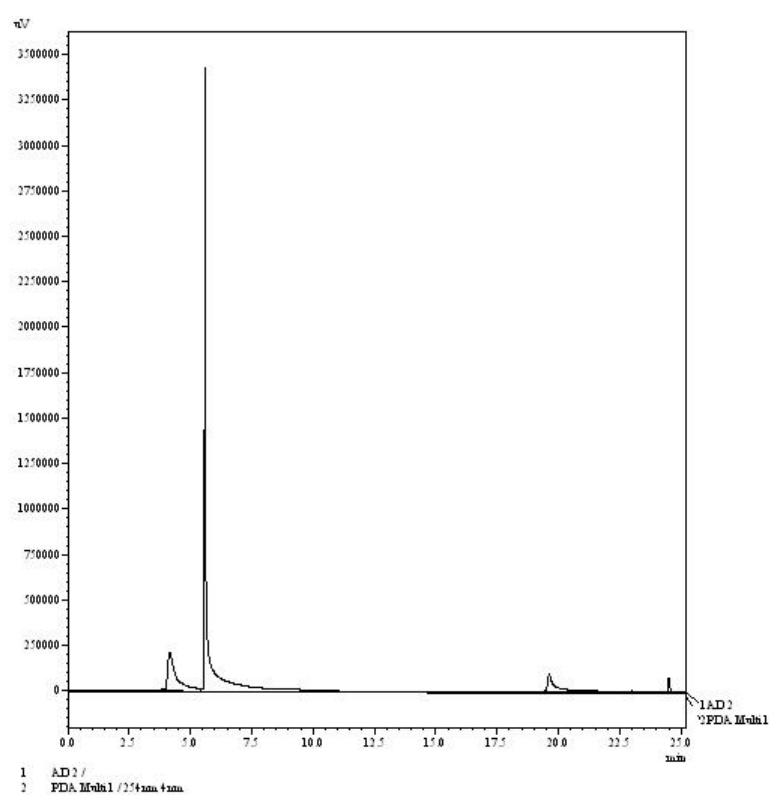

**Figure S4.** HPLC analysis of citrinin.

**Table S1.** Bacterial strains and plasmids.

| Strain or plasmid                        | Relevant genotype                                               | Source                         |
|------------------------------------------|-----------------------------------------------------------------|--------------------------------|
| <b>Strains</b>                           |                                                                 |                                |
| <i>P. aeruginosa</i> PAO1                | Wild type                                                       | Schuster and Greenberg. (2007) |
| <i>Chromobacterium violaceum</i> CV026   | $\Delta cvlI$ , mini Tn5 mutant of CV31532                      | McLean. (2004)                 |
| <i>Chromobacterium violaceum</i> CV12472 | Wild type                                                       | McLean. (2004)                 |
| <i>E. coli</i> MG4/pKDT17                | <i>E. coli</i> DH5a harboring plasmid MG4/pKDT17                | Hong et al. (2012)             |
| <i>E. coli</i> pEAL08-2                  | <i>E. coli</i> DH5a harboring plasmid pEAL08-2                  | Cugini et al. (2007)           |
| <i>E. coli</i> pDSY                      | <i>E. coli</i> DH5a harboring plasmid pDSY                      | Zhao et al. (2021)             |
| <b>Plasmids</b>                          |                                                                 |                                |
| MG4/pKDT17                               | <i>PlasB-lacZ</i> , and <i>Plac-lasR</i> transcriptional fusion | Pearson et al. (1994)          |
| pEAL08-2                                 | <i>PpqSA-lacZ</i> , and <i>Plac-pqsR</i> transcriptional fusion | Cugini et al. (2007)           |
| pDSY                                     | <i>PrhlA-lacZ</i> , and <i>Plac-rhlR</i> transcriptional fusion | Zhao et al. (2021)             |

**Table S2.** The primer sequences for real-time RT-PCR.

| primers         | sequences (5' to 3')  | primers         | sequences (5' to 3')   |
|-----------------|-----------------------|-----------------|------------------------|
| <i>rpsl</i> (F) | GCAACTATCAACCAGCTGGTG | <i>rpsl</i> (R) | GCTGTGCTCTTGCAGGTTGTG  |
| <i>lasR</i> (F) | CTGTGGATGCTCAAGGACTAC | <i>lasR</i> (R) | AACTGGTCTTGCCGATGG     |
| <i>lasI</i> (F) | GGCTGGGACGTTAGTGTCAT  | <i>lasI</i> (R) | AAAACCTGGGCTTCAGGAGT   |
| <i>lasB</i> (F) | ACCAGAAGATCGGCAAGTAC  | <i>lasB</i> (R) | GTTGACCTGCTTGTAGGTGTTG |
| <i>rhlR</i> (F) | CTGGGCTTCGATTACTACGC  | <i>rhlR</i> (R) | CCCGTAGTTCTGCATCTGGT   |
| <i>rhlI</i> (F) | GTAGCGGGTTTGCGGATG    | <i>rhlI</i> (R) | CGGCATCAGGTCTTCATCG    |
| <i>rhlA</i> (F) | GGCGATCGGCCATCT       | <i>rhlA</i> (R) | AGCGAAGCCATGTGCTGAT    |
| <i>pqsR</i> (F) | CTGATCTGCCGGTAATTGG   | <i>pqsR</i> (R) | ATCGACGAGGAACTGAAGA    |
| <i>pqsA</i> (F) | GACCGGCTGTATTCGATTC   | <i>pqsA</i> (R) | GCTGAACCAGGGAAAGAAC    |
| <i>phzH</i> (F) | TGCGCGAGTTCAGCCACCTG  | <i>phzH</i> (R) | TCCGGGACATAGTCGGCGCA   |
